# Supplementary material for: Zinc solubilizing bacteria and their potential as bioinoculant for growth promotion of green soybean (Glycine max L. Merr.)
Source: PeerJ. 2023 May 10;11:e15128. doi: 10.7717/peerj.15128 (PMC10182760; doi:10.7717/peerj.15128)
Supplement: Supplemental Information 1 [file peerj-11-15128-s001.xlsx]

## Sheet: Sheet1
Table 2 S1: Zinc solubilizing efficiency of different ZSB isolates in solid medium using insoluble zinc compounds
	ZnO			ZnCO3
	Ø Colony	Ø Clear Zone	S.E.	Ø Colony	Ø Clear Zone	S.E.	ZnO				ZnCO3
	(cm)	(cm)		(cm)	(cm)		Average colony diameter	SD	Average S.E.	SD	Average colony diameter	SD	Average S.E.	SD
KAH109	0.37	0.85	2.2973	0.66	1.56	2.36364	0.37	0.06	2.8406	0.472934	0.796667	0.179536	2.27377	0.0975639
	0.43	1.34	3.16	1	2.17	2.17
	0.31	0.95	3.06452	0.73	1.67	2.28767
KPIB103	0.53	1.24	2.33962	0.55	1.2	2.18182	0.543333	0.0152753	2.16259	0.170271	0.54	0.0264575	2.16051	0.0197353
	0.54	1.16	2.14815	0.56	1.2	2.14286
	0.56	1.12	2	0.51	1.1	2.15686
KPIB105	0.46	1.31	2.84	0.77	1.5	1.94805	0.376667	0.0737111	2.32619	0.358515	0.683333	0.0757188	1.75843	0.166708
	0.35	0.71	2.02857	0.65	1.1	1.69231
	0.32	0.67	2.11	0.63	1.03	1.63492
KRME106	0.43	0.83	1.93023	0.85	1.77	2.09	0.486667	0.0737111	2.19592	0.366503	0.826667	0.146401	2.00333	0.0776745
	0.46	0.94	2.04348	0.67	1.31	1.94
	0.57	1.49	2.61404	0.96	1.9	1.98
KEX206	0.55	0.95	1.72727	0.55	1.24	2.25	0.533333	0.0288675	2.01455	0.260781	0.52	0.146401	2.38667	0.126623
	0.5	1.04	2.08	0.5	1.25	2.5
	0.55	1.23	2.23636	0.51	1.23	2.41
KEX505	0.35	0.52	1.48571	1.05	1.76	1.67619	0.326667	0.0208167	1.32084	0.14413	0.81	0.216333	1.92804	0.249248
	0.32	0.39	1.21875	0.75	1.45	1.93333
	0.31	0.39	1.25806	0.63	1.37	2.1746
