# Supplementary material for: Zinc solubilizing bacteria and their potential as bioinoculant for growth promotion of green soybean (Glycine max L. Merr.)
Source: PeerJ. 2023 May 10;11:e15128. doi: 10.7717/peerj.15128 (PMC10182760; doi:10.7717/peerj.15128)
Supplement: Supplemental Information 2 [file peerj-11-15128-s002.xlsx]

## Sheet: Sheet1
Std Rep1
Zn (mg/L)	Asb average	Asb1	Asb2
0	0	0	0
0.5	0.08875	0.0888	0.0887
1	0.1727	0.1726	0.1728
1.5	0.2494	0.2493	0.2495
2	0.3305	0.331	0.33
2.5	0.3955	0.3956	0.3954
Std Rep2
Zn (mg/L)	Asb average	Asb1	Asb2
0	0	0	0
0.5	0.0878	0.0877	0.0879
1	0.1767	0.1766	0.1768
1.5	0.2511	0.2513	0.2509
2	0.3358	0.3351	0.3365
2.5	0.391	0.3906	0.3914
Isolate	Replication 1				Replication 2				Zn-solubilize x dilution 50x
	Soluble zinc (mg/L)	asb1	asb2	Asb average	Soluble zinc (mg/L)	asb1	asb2	Asb average	Rep1	Rep2	AV	SD	Zn-solubilize (mg/L)
KAH109	1.27362	0.2001	0.2151	0.2076	1.24204	0.2048	0.2011	0.20295	63.681	62.1022	62.8916	1.11636	62.79 ± 1.20
KPIB103	0.912883	0.1482	0.1494	0.1488	0.947674	0.1596	0.1501	0.15485	45.6442	47.3837	46.5139	1.23005	45.18 ± 1.26
KPIB105	1.05215	0.1719	0.1711	0.1715	0.961444	0.1553	0.1589	0.1571	52.6074	48.0722	50.3398	3.20683	50.62 ± 3.02
KRME106	0.832822	0.1353	0.1362	0.13575	0.946144	0.159	0.1502	0.1546	41.6411	47.3072	44.4742	4.00655	41.58 ± 4.26
KEX206	0.804601	0.1315	0.1308	0.13115	0.873929	0.1451	0.1405	0.1428	40.2301	43.6965	41.9633	2.45111	40.38 ± 3.61
KEX505	0.723313	0.1155	0.1203	0.1179	0.745104	0.1229	0.1206	0.12175	36.1656	37.2552	36.7104	0.770434	36.12 ± 0.32
control	0.241718	0.0387	0.0401	0.0394	0.248164	0.041	0.0401	0.04055	12.0859	12.4082	12.247	0.227908	12.25±0.23
