# Supplementary material for: Zinc solubilizing bacteria and their potential as bioinoculant for growth promotion of green soybean (Glycine max L. Merr.)
Source: PeerJ. 2023 May 10;11:e15128. doi: 10.7717/peerj.15128 (PMC10182760; doi:10.7717/peerj.15128)
Supplement: Supplemental Information 3 [file peerj-11-15128-s003.xlsx]

## Sheet: Sheet1
Phosphate solubilizing on Pikovskaya agar
code	Ø Colony (cm)	Ø Clear Zone (cm)	S.E.	S.E. Average	SD
KPIB103	0.55	0.6	1.09	1.09333	0.0057735
	0.5	0.55	1.1
	0.55	0.6	1.09
KRME106	0.65	0.7	1.07	1.10667	0.0472582
	0.6	0.7	1.16
	0.55	0.6	1.09
Potassium solubilizing on Alexandrove agar
	Ø Colony (cm)	Ø Clear Zone (cm)	S.E.	Average S.E.	SD
KEX505	0.56	0.71	1.26786	1.21609	0.0939087
	0.65	0.72	1.10769
	0.55	0.7	1.27273
Stadard IAA
IAA (ug/mL)	Abs 530nm (Average)
0	0
20	0.407
40	0.664
60	0.829
80	0.9775
100	1.2074
Isolate	IAA (Rep1)	IAA (Rep2)	IAA (Rep3)	mean	SD
KAH109	34.015	32.913	33.385	33.44	0.55
KPIB105	16.929	22.834	21.968	20.58	3.19
KRME106	30.078	33.385	31.395	31.62	1.66
KEX206	14.173	9.842	10.078	11.36	2.44
KEX505	13.464	19.763	18.503	17.24	3.33
