# Supplementary material for: Zinc solubilizing bacteria and their potential as bioinoculant for growth promotion of green soybean (Glycine max L. Merr.)
Source: PeerJ. 2023 May 10;11:e15128. doi: 10.7717/peerj.15128 (PMC10182760; doi:10.7717/peerj.15128)
Supplement: Supplemental Information 4 [file peerj-11-15128-s004.xlsx]

## Sheet: Sheet1
	Table 5 S4: Effect of ZSB on growth and yield of green soybean (Glycine max L. Merr) in greenhouse experiment
Shoot length (cm)					Root length (cm)				Number of pod/plant				Number of grain/plant				Plant dry weight (g)
Plant	control	PC	KAH109	KEX505	control	PC	KAH109	KEX505	control	PC	KAH109	KEX505	control	PC	KAH109	KEX505	control	PC	KAH109	KEX505
1	22.5	32	26.5	31.5	44	46	41.6	50.5	7	10	13	16	19	25	37	30	5.446	5.382	6.872	5.949
2	30	25.5	27	36	40	46.5	59.5	49.5	8	11	15	16	25	24	35	27	4.558	4.907	7.1	6.013
3	27	31	34	39	40	57	55	49	6	10	12	17	25	29	35	31	3.925	6.188	5.319	4.902
4	26.5	29	25	30.3	50	54.3	51	45.5	9	12	13	18	16	25	29	27	4.721	5.951	7.222	5.537
5	28.5	36	28.5	27.5	41	45.5	52	51.5	8	9	10	12	28	34	27	27	6.163	6.013	6.102	6.021
6	26.5	24	28.5	23.2	47.5	53	48	52	7	11	10	12	26	35	22	36	5.601	5.905	6.306	7.062
7	31	35	28.9	23.5	48	45	53.5	50.7	10	10	11	17	12	30	30	38	6.017	5.501	7.839	5.111
8	25.5	27	26	25.5	39.5	54	42	46.5	7	12	13	13	28	30	30	28	5.52	6.005	6.073	4.82
9	28	25	25	27	36.5	55.5	46	48.5	6	9	11	15	20	30	35	32	5.52	6.005	6.073	4.82
10	23	23	26.5	30.8	37	47	43.5	54	6	11	11	17	19	35	49	30	5.451	5.232	7.922	5.021
11	27.5	24.5	25.7	30.5	40.5	50	57.5	53.5	9	10	10	16	20	27	32	40	4.949	6.148	8.014	6.22
12	20.5	29	25	25	47.5	41.5	48.5	45	6	11	11	23	25	35	40	28	7.435	6.106	8.141	5.001
13	28.5	30.5	30	28	45.5	59	57	55.5	8	10	11	13	20	49	26	21	5.602	5.87	7.162	7.305
14	26	29	21.5	28	47.5	49.5	57.5	65	6	11	11	23	24	28	30	22	4.338	6.02	6.55	7.306
15	29	24.5	25	26.5	39.5	51.5	54.5	60	7	9	10	12	22	40	33	28	5.664	5.083	6.031	6.93
